# Supplementary material for: Catabolic Machinery of the Human Gut Microbes Bestow Resilience Against Vanillin Antimicrobial Nature
Source: PubMed Central journal article supplement (PMC7605359; doi:10.3389/fmicb.2020.588545), 2020-10-16
Supplement: Data_Sheet_1.pdf [file Data_Sheet_1.pdf]

# **Catabolic machinery of the human gut microbes bestow resilience against vanillin antimicrobial nature**

**Monika Yadav<sup>1</sup>, Rajesh Pandey<sup>2†\*</sup>, and Nar Singh Chauhan<sup>1\*</sup>**

<sup>1</sup>Department of Biochemistry, Maharshi Dayanand University, Rohtak, Haryana, India

<sup>2</sup>Genomics and Molecular Medicine, CSIR-Institute of Genomics and Integrative Biology (CSIR-IGIB) Delhi-110007, India

\*Corresponding author

**Nar Singh Chauhan** ([nschauhan@mdurohtak.ac.in](mailto:nschauhan@mdurohtak.ac.in))

†Co- Corresponding author

**Rajesh Pandey** ([rajeshp@igib.res.in](mailto:rajeshp@igib.res.in))

## (A) Supplementary methods

### Supplementary method SM1: Sample processing and chromatographic separation

Quenching of the samples was performed by incubating with 60% aqueous methanol solution (-48 °C). Samples were centrifuged immediately at 16060g for 10 min at -10 °C followed by snap-freezing in liquid nitrogen. Metabolites were extracted with methanol by freeze-thaw cycling. Samples were centrifuged immediately at 16060g for 10 min at -10 °C to collect the supernatant followed by its storage at -86°C. An additional volume of 500 µL of 100% methanol (-48 °C) was added to the pellet followed by freeze-thaw cycling. Samples were centrifuged again at 16060g for 10 min at -10 °C to collect the supernatant. Both supernatants (first and second cycle) were pooled and stored at -86°C for further analysis. A 400µl acetonitrile (HPLC grade) was added in each vial followed by centrifugation at 5000 rev min<sup>-1</sup> for 10 minutes and the supernatant was collected. Untargeted metabolic profiling was performed with Exion LC system integrated AB SCIEX X500B QTOF mass spectrometer (SCIEX, USA). ExionLC™ System fitted with an Agilent PLRP-S column (2.1 mm×50 mm, 300 Å, 5 µm) was employed for chromatographic separation of metabolites. Chromatography was carried out at 80°C using acetonitrile gradient (Table SM1). The column was equilibrated with the mobile phase for 30 min prior to the sample injection. Sample injection volume was 10.0 µL, and the total run time was 20 min per sample.

**Table SM1.** Liquid chromatographic conditions used in this study

| Time (min) | Flow (mL min <sup>-1</sup> ) | 0.1% formic acid in<br>water (%) | 0.1% formic acid in<br>acetonitrile (%) |
|------------|------------------------------|----------------------------------|-----------------------------------------|
| 4.00       | 0.6000                       | 95.0                             | 5.0                                     |
| 8.00       | 0.6000                       | 50.0                             | 50.0                                    |
| 10.00      | 0.6000                       | 50.0                             | 50.0                                    |
| 14.00      | 0.6000                       | 5.0                              | 95.0                                    |
| 16.00      | 0.6000                       | 5.0                              | 95.0                                    |
| 18.00      | 0.6000                       | 95.0                             | 5.0                                     |
| 20.00      | 0.6000                       | 95.0                             | 5.0                                     |

**Supplementary method SM2: Mass spectrometric detection of metabolites**

AB SCIEXX500B QTOF mass spectrometer with a Turbo V Ion Source fitted with a Twin Sprayer ESI Probe was operated in the ESI- & ESI+ mode for data acquisition. Mass spectrophotometer instrument experimental conditions are listed in Table 2. Data was captured with SCIEX OS 1.4.

**Table SM2.** Mass spectrophotometer instrument conditions in the current study

| <b>Parameter</b>       | <b>ESI +ve mode</b> | <b>ESI -ve mode</b> |
|------------------------|---------------------|---------------------|
| Gas 1                  | 50 psi              | 50 psi              |
| Gas 2                  | 60 psi              | 50 psi              |
| Curtain gas            | 35 psi              | 35 psi              |
| Temperature            | 550 °C              | 550 °C              |
| Ion Spray Voltage      | 5500 V              | -4500 V             |
| Time Bin to Sums       | 4                   | 4                   |
| Accumulation Time      | 0.25s               | 0.25s               |
| TOF Start Mass         | 100 da              | 100 da              |
| TOF Stop Mass          | 2000 da             | 2000 da             |
| Declustering Potential | 80V                 | -80V                |
| Collision Energy       | 10V                 | -10V                |

(B) **Supplementary Tables**

**Supplementary Table S1.** Human gut metagenome datasets used for comparative analysis.

| <b>Sr No</b> | <b>Origin of the Metagenomic Dataset</b> | <b>Nature of Dataset</b> | <b>Datasets</b> | <b>Accession ID</b>                                               |
|--------------|------------------------------------------|--------------------------|-----------------|-------------------------------------------------------------------|
| 1            | USA                                      | Unassembled reads        | 59              | MGP98 ( <a href="http://www.mg-rast.org">www.mg-rast.org</a> )    |
| 2            | Sweden                                   | Unassembled reads        | 80              | MGP13068 ( <a href="http://www.mg-rast.org">www.mg-rast.org</a> ) |
| 3            | Japan                                    | Unassembled reads        | 13              | MGP29 ( <a href="http://www.mg-rast.org">www.mg-rast.org</a> )    |
| 4            | Japan                                    | Unassembled reads        | 13              | MGP4778 ( <a href="http://www.mg-rast.org">www.mg-rast.org</a> )  |
| 5            | Malawi                                   | Unassembled reads        | 19              | MGP98 ( <a href="http://www.mg-rast.org">www.mg-rast.org</a> )    |
| 6            | Venezuela                                | Unassembled reads        | 21              | MGP98 ( <a href="http://www.mg-rast.org">www.mg-rast.org</a> )    |
| 7            | Malaysia                                 | Unassembled reads        | 8               | MGP5712 ( <a href="http://www.mg-rast.org">www.mg-rast.org</a> )  |

**Supplementary Table S2.** Statistics of the current human gut metagenome dataset.

|                                     |                   |
|-------------------------------------|-------------------|
| Total bp Count                      | 12,068,464,868 bp |
| Artificial Duplicate Reads          | 10117308          |
| Basepairs Count after QC            | 5474023416 bp     |
| Sequences Count after QC            | 27037796          |
| Mean Sequence Length after QC       | 403 ± 134 bp      |
| Mean GC percent after QC            | 48 ± 7 %          |
| Predicted Protein Features after QC | 12,077,035        |

**Supplementary Table S3.** Phylogenetic affiliation of the protein features identified in the current dataset.

| <b>Phylum</b>          | <b>Abundance (%)</b> |
|------------------------|----------------------|
| Acidobacteria          | 0.00770638           |
| Actinobacteria         | 0.139525335          |
| Apicomplexa            | 0.000312677          |
| Aquificae              | 0.00222932           |
| Arthropoda             | 0.000586317          |
| Ascomycota             | 0.00237387           |
| Bacillariophyta        | 0.000185132          |
| Bacteroidetes          | 7.869747336          |
| Basidiomycota          | 0.00027364           |
| CandidatusPoribacteria | 0.000137593          |
| Chlamydiae             | 0.001310228          |
| Chlorobi               | 0.014421781          |
| Chloroflexi            | 0.006810865          |
| Chlorophyta            | 0.000539164          |
| Chordata               | 0.001554494          |
| Chrysiogenetes         | 0.000437516          |
| Cnidaria               | 0.000346302          |
| Crenarchaeota          | 0.000703426          |
| Cyanobacteria          | 0.0131417            |
| Deferribacteres        | 0.001990464          |
| Deinococcus-Thermus    | 0.003054106          |
| Dictyoglomi            | 0.00182311           |
| Echinodermata          | 5.95207E-05          |
| Elusimicrobia          | 0.001265007          |
| Euglenida              | 7.72996E-07          |
| Euryarchaeota          | 0.016913919          |
| Fibrobacteres          | 0.013110393          |

---

|                                                |             |
|------------------------------------------------|-------------|
| Firmicutes                                     | 1.302473382 |
| Fusobacteria                                   | 0.016145947 |
| Gemmatimonadetes                               | 0.000269389 |
| Hemichordata                                   | 7.34346E-06 |
| Korarchaeota                                   | 3.40118E-05 |
| Lentisphaerae                                  | 0.007816919 |
| Microsporidia                                  | 4.21283E-05 |
| Nanoarchaeota                                  | 7.72996E-07 |
| Nematoda                                       | 0.000149575 |
| Nitrospirae                                    | 0.001024219 |
| Phaeophyceae                                   | 1.15949E-06 |
| Placozoa                                       | 5.21772E-05 |
| Planctomycetes                                 | 0.002410974 |
| Platyhelminthes                                | 1.04354E-05 |
| Proteobacteria                                 | 0.499405458 |
| Spirochaetes                                   | 0.014380425 |
| Streptophyta                                   | 0.001115433 |
| Synergistetes                                  | 0.005085152 |
| Tenericutes                                    | 0.002952844 |
| Thaumarchaeota                                 | 7.30481E-05 |
| Thermotogae                                    | 0.006441373 |
| Verrucomicrobia                                | 0.031747319 |
| Unclassified (derived from Bacteria)           | 0.000880829 |
| Unclassified (derived from Eukaryota)          | 0.004035424 |
| Unclassified (derived from Viruses)            | 0.002742589 |
| Unclassified (derived from other<br>sequences) | 0.000253543 |

---

**Supplementary Table S4.** Abundance profile of the Cluster of orthologous groups (COGs) identified in current metagenomic datasets.

| <b>COGs Clustering (Level-1)</b>   | <b>COGs Clustering (Level-2)</b>                              | <b>Abundance (%)</b> |
|------------------------------------|---------------------------------------------------------------|----------------------|
| Cellular processes and signaling   | Cell cycle control, cell division, chromosome partitioning    | 0.852646239          |
| Cellular processes and signaling   | Cell motility                                                 | 0.176844244          |
| Cellular processes and signaling   | Cell wall/membrane/envelope biogenesis                        | 7.615568383          |
| Cellular processes and signaling   | Cytoskeleton                                                  | 0.001857352          |
| Cellular processes and signaling   | Defense mechanisms                                            | 3.175036218          |
| Cellular processes and signaling   | Extracellular structures                                      | 0.0075512            |
| Cellular processes and signaling   | Intracellular trafficking, secretion, and vesicular transport | 2.321446079          |
| Cellular processes and signaling   | Posttranslational modification, protein turnover, chaperones  | 3.506771417          |
| Cellular processes and signaling   | Signal transduction mechanisms                                | 2.368367047          |
| Information storage and processing | Chromatin structure and dynamics                              | 0.001065694          |
| Information storage and processing | RNA processing and modification                               | 0.004415016          |
| Information storage and processing | Replication, recombination and repair                         | 7.810803454          |
| Information storage and processing | Transcription                                                 | 3.277860428          |
| Information storage and processing | Translation, ribosomal structure and biogenesis               | 6.785575746          |
| Metabolism                         | Amino acid transport and metabolism                           | 11.77344815          |
| Metabolism                         | Carbohydrate transport and metabolism                         | 15.33149466          |
| Metabolism                         | Coenzyme transport and metabolism                             | 4.338134232          |
| Metabolism                         | Energy production and conversion                              | 6.497838469          |
| Metabolism                         | Inorganic ion transport and metabolism                        | 5.59132903           |
| Metabolism                         | Lipid transport and metabolism                                | 2.394430868          |
| Metabolism                         | Nucleotide transport and metabolism                           | 3.668056534          |
| Metabolism                         | Secondary metabolites biosynthesis, transport and catabolism  | 0.583969654          |
| Poorly characterized               | Function unknown                                              | 0.604522317          |
| Poorly characterized               | General function prediction only                              | 11.31096757          |



**Supplementary Table S5.** Correlation among the ribosomal features of the current metagenomic dataset with other datasets at different taxonomic levels.

| <b>Taxonomic</b> |               | <b>Japan</b>     | <b>Japan2</b>   |                 |               |            |                  |
|------------------|---------------|------------------|-----------------|-----------------|---------------|------------|------------------|
| <b>Level</b>     | <b>Malawi</b> | <b>(MGP4778)</b> | <b>(MGP 29)</b> | <b>Malaysia</b> | <b>Europe</b> | <b>USA</b> | <b>Venezuela</b> |
| Domain           | 0.999999667   | 0.999998         | 1               | 1               | 0.999999      | 0.999999   | 1                |
| Phylum           | 0.434643202   | 0.38289          | 0.268309        | -0.0248         | 0.316315      | 0.379972   | 0.509737         |
| Class            | 0.789851539   | 0.64336          | 0.663018        | 0.912729        | 0.868018      | 0.780327   | 0.781199         |

**Supplementary Table S6.** Abundance profile of vanillin catabolic features across gut metagenome datasets.

| <b>Vanillin Catabolic Feature</b>              | <b>Malawi</b> | <b>Japan (MGP4778)</b> | <b>Japan (MGP29)</b> | <b>Malaysia</b> | <b>Europe</b> | <b>USA</b> | <b>Venezuela</b> |
|------------------------------------------------|---------------|------------------------|----------------------|-----------------|---------------|------------|------------------|
| Protocatechuate 3,4-dioxygenase alpha chain    | 1.063829787   | 6.08108                | 0                    | 2.45902         | 0             | 4.348      | 1.8867925        |
| Protocatechuate 3,4-dioxygenase beta chain     | 1.063829787   | 8.10811                | 3.3898               | 1.63934         | 0             | 3.804      | 0                |
| 3-carboxy-cis,cis-muconate cycloisomerase      | 0             | 4.72973                | 3.3898               | 9.01639         | 0.05681       | 3.895      | 0.6289308        |
| 4-carboxymuconolactone decarboxylase           | 86.17021277   | 45.9459                | 71.186               | 1.63934         | 84.3969       | 45.29      | 74.213836        |
| 3-oxoadipate CoA-transferase subunit A         | 0             | 7.43243                | 0                    | 4.09836         | 1.45806       | 0.091      | 1.8867925        |
| 3-oxoadipate CoA-transferase subunit B         | 0             | 0                      | 1.6949               | 0               | 0.03787       | 0.906      | 0                |
| Beta-ketoadipateenol-lactone hydrolase         | 1.063829787   | 0                      | 5.0847               | 0               | 2.49953       | 2.899      | 2.5157233        |
| Beta-ketoadipyl CoA thiolase                   | 0             | 0                      | 0                    | 0               | 0.35978       | 0.815      | 0                |
| Pcaregulon regulatory protein                  | 0             | 0                      | 0                    | 1.63934         | 0.03787       | 5.616      | 2.5157233        |
| Beta-ketoadipateenol-lactone hydrolase         | 0             | 0                      | 0                    | 8.19672         | 0.43552       | 0.543      | 0.6289308        |
| Dicarboxylic acid transporter                  | 1.063829787   | 2.7027                 | 1.6949               | 9.83607         | 0             | 0          | 0                |
| Catechol 1,2-dioxygenase                       | 0             | 4.72973                | 0                    | 0               | 0             | 0.725      | 0                |
| Muconate cycloisomerase                        | 1.063829787   | 0.67568                | 3.3898               | 3.27869         | 1.17402       | 3.442      | 0                |
| Muconolactone isomerase                        | 1.063829787   | 0.67568                | 0                    | 1.63934         | 0.13255       | 2.083      | 0                |
| Succinyl-CoA:3-ketoacid-coenzyme A transferase | 2.127659574   | 0.67568                | 5.0847               | 39.3443         | 0.05681       | 0.453      | 0                |
| Mandelateracemase/muconate lactonizase         | 3.191489362   | 10.1351                | 1.6949               | 0.81967         | 6.3435        | 10.33      | 5.6603774        |
| Vanillin dehydrogenase                         | 0             | 0                      | 0                    | 5.7377          | 1.60954       | 2.536      | 0                |
| Vannilate transporter                          | 2.127659574   | 0                      | 0                    | 4.09836         | 0.83318       | 4.167      | 5.0314465        |
| Vanillate O-demethylase                        | 0             | 8.10811                | 3.3898               | 6.55738         | 0.56807       | 8.062      | 5.0314465        |

1 **Supplementary Figures (C)**

2

3 **Supplementary Figure S1.** Phylogenetic affiliation of SSU rRNA sequences derived from human feces metagenomic DNA.

4 Taxonomic distribution of SSU rRNA sequences affiliated with Bacteroidetes (a) and Firmicutes (b).

a.

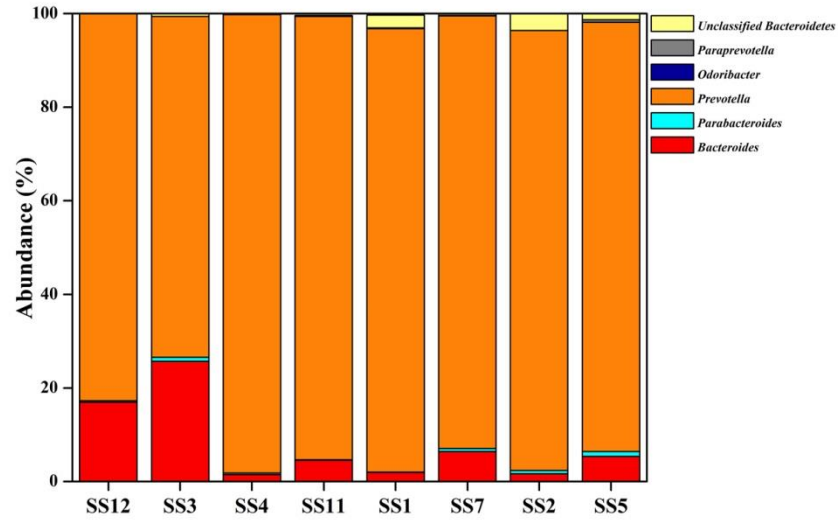

b.

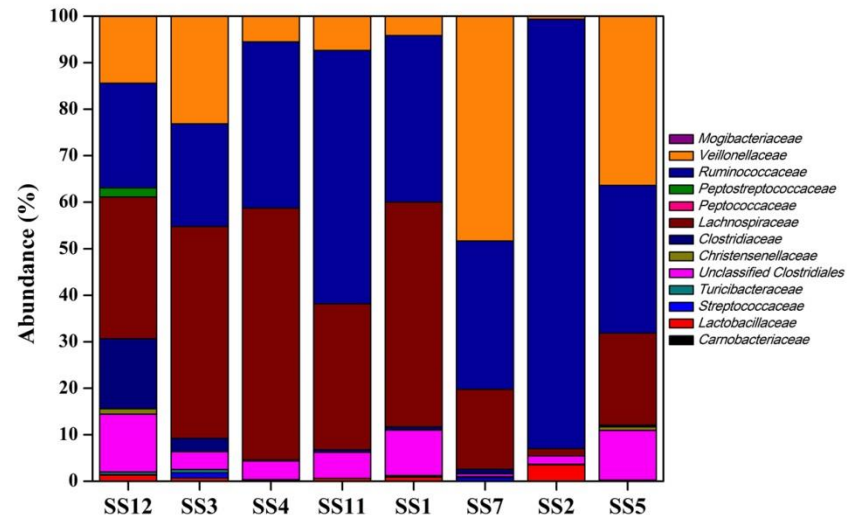

5

6

7

8

9

10

11 **Supplementary Figure S2.** Principle component analysis plots at different taxonomic levels (domain (a), phylum (b) and class(c)  
12 taxonomic levels).

a.

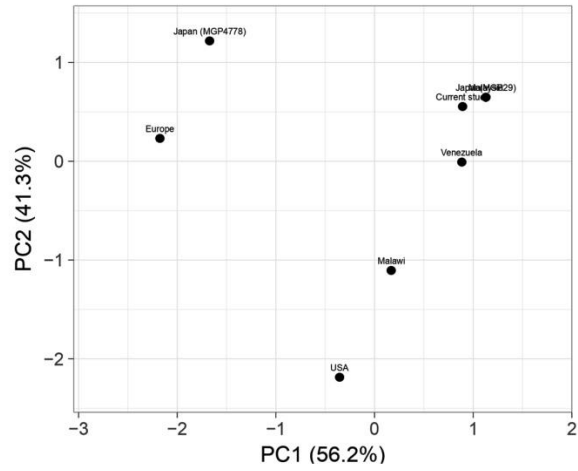

b.

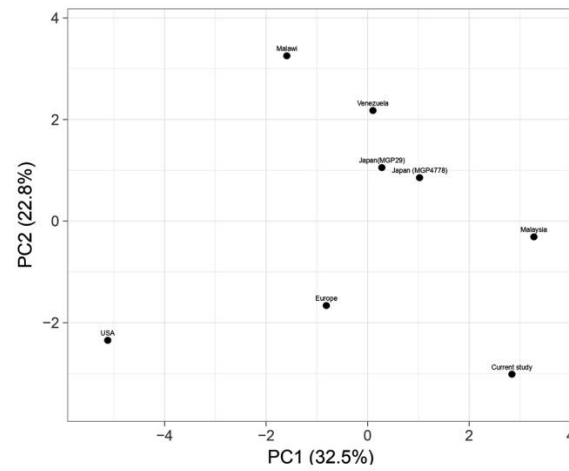

c.

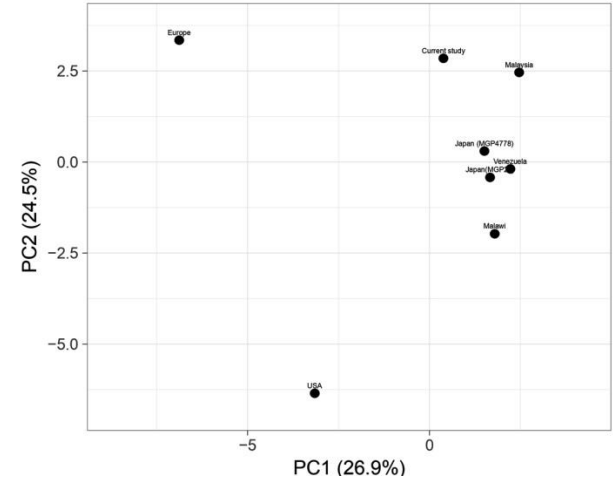

13  
14  
15  
16  
17  
18  
19  
20  
21

22 **Supplementary Figure S3.** Heatmap showing correlation of representative ribosomal features among metagenomic datasets at  
 23 different taxonomic levels (domain (a), phylum (b) and class(c) taxonomic levels).

24

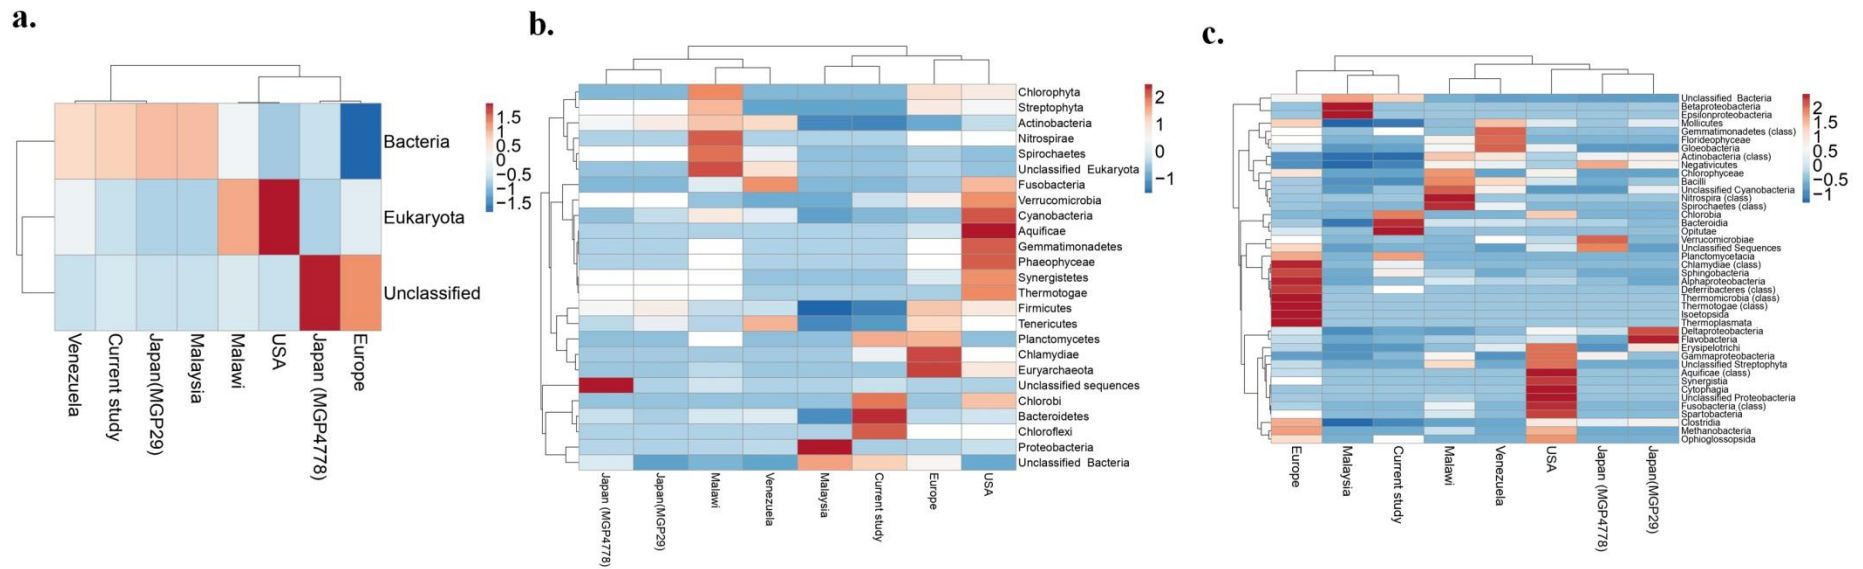

25

26

27

28

29

30

31

32

33 **Supplementary Figure S4.** The functional assessment of vanillin catabolism using LC-MS analysis from the microbial pellet  
34 incubated with 5mM vanillin at 37°C for 24hrs.

35

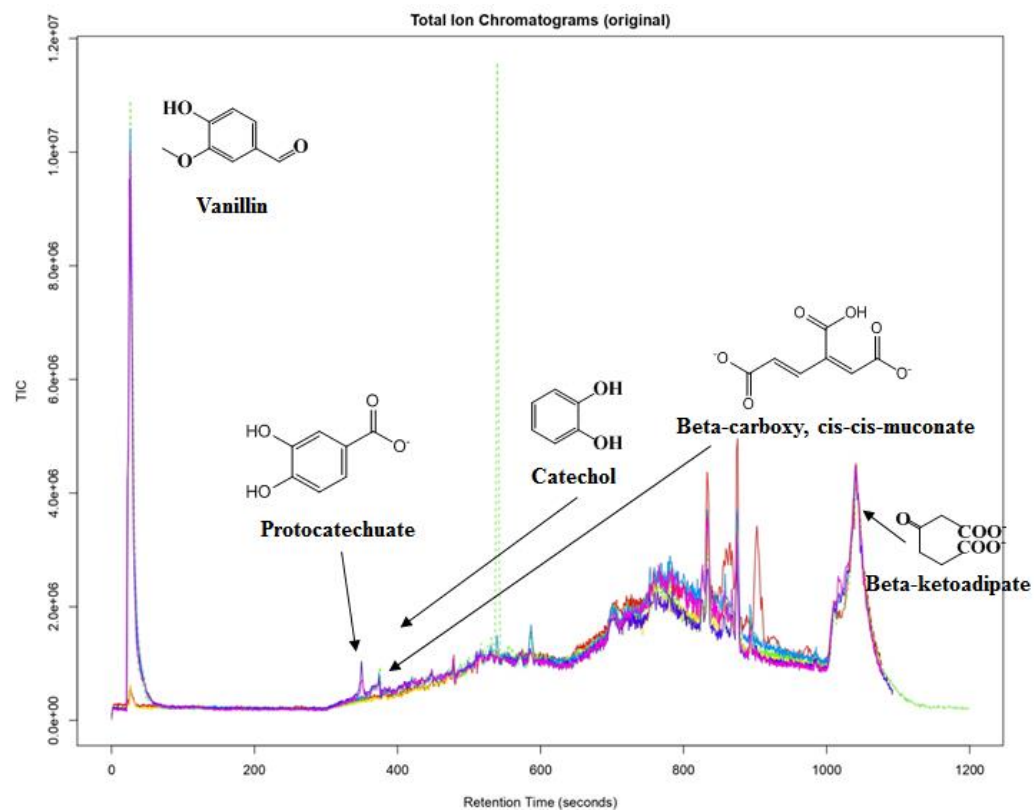

36
